1 **Naive human B cells can neutralize SARS-CoV-2 through recognition of its**  
2 **receptor binding domain**

3  
4  
5  
6  
7 Jared Feldman<sup>1\*</sup>, Julia Bals<sup>1\*</sup>, Kerri St. Denis<sup>1</sup>, Evan C. Lam<sup>1</sup>, Blake M. Hauser<sup>1</sup>, Larance  
8 Ronsard<sup>1</sup>, Maya Sangesland<sup>1</sup>, Thalia Bracamonte Moreno<sup>1</sup>, Vintus Okonkwo<sup>1</sup>, Nathania Hartojo<sup>1</sup>  
9 Alejandro B. Balazs<sup>1</sup>, Daniel Lingwood<sup>1#</sup> and Aaron G. Schmidt<sup>1,2#</sup>

10  
11  
12  
13  
14 <sup>1</sup>Ragon Institute of MGH, MIT and Harvard, Cambridge, MA, 02139, USA

15  
16 <sup>2</sup>Department of Microbiology, Harvard Medical School, Boston, MA 02115, USA

17  
18 \*equal contribution

19  
20 #corresponding

21  
22  
23 **Key words:** germline precursors, B cells, immunity, SARS-CoV-2, coronaviruses

24  
25  
26  
27  
28  
29 **Correspondence:**

30  
31 Daniel Lingwood  
32 Tel: 857-268-7180; E-mail: [dlingwood@mgh.harvard.edu](mailto:dlingwood@mgh.harvard.edu)

33  
34 Aaron G. Schmidt  
35 Tel: 857-268-7118; E-mail: [aschmidt@crystal.harvard.edu](mailto:aschmidt@crystal.harvard.edu)

36  
37  
38  
39 Running title: Isolation of antibody germline precursors that bind and neutralize SARS-CoV-2

40  
41  
42  
43

44 **ABSTRACT**

45

46 Exposure to a pathogen elicits an adaptive immune response aimed to control and eradicate. This  
47 initial exposure is imprinted on the immune system, so that a subsequent encounter to the same  
48 pathogen or a variant will result in a memory recall response that is often protective. Interrogating  
49 the naive B cell repertoire in terms of both abundance and specificity to said pathogen may  
50 contribute to an understanding of how to potentially elicit protective responses. Here, we isolated  
51 naive B cells across 8 human donors, targeting the SARS-CoV-2 receptor-binding domain (RBD).  
52 Single B cell sorting, and subsequent sequence analysis, showed diverse gene usage and pairing  
53 with no apparent restriction on complementarity determining region length in either the heavy or  
54 light chains. We show that recombinantly expressed IgGs and Fabs of these germline precursors  
55 bind SARS-CoV-2 RBD. Importantly, a subset of these naive antibodies also bind SARS-CoV, an  
56 emergent variant (501Y.V2) and a potential pandemic (WIV-1) coronavirus. Furthermore, naive  
57 antibodies can also neutralize SARS-CoV-2 pseudoviruses in the absence of any somatic  
58 hypermutation, suggesting that protective immunity to coronaviruses, more broadly, may be  
59 genetically encoded. Future studies aimed at understanding the naive repertoire to other  
60 coronaviruses may ultimately reveal shared specificities that could be leveraged to develop pan-  
61 coronavirus vaccines aimed at priming encoded germline responses.

62

63

64 **MAIN TEXT**

65 Initial exposure to viral antigens by natural infection or vaccination primes an immune response  
66 and often establishes an immune memory which can prevent or control future infections. The naive  
67 repertoire contains potential B cell receptor (BCR) rearrangements capable of recognizing these  
68 antigens, often the surface-exposed glycoproteins. An early step in generating humoral immunity  
69 involves activation of these naive B cells through recognition of a cognate antigen (1) which in  
70 turn can lead to affinity maturation through somatic hypermutation (SHM) and subsequent  
71 differentiation (2). The initial engagement of the naive repertoire begins this cascade and often  
72 coincides with the eventual generation of a protective or neutralizing antibody response (3, 4).

73  
74 For SARS-CoV-2, the etiological agent of COVID-19, the development of a neutralizing antibody  
75 response after primary infection or vaccination is associated with protection against reinfection in  
76 non-human primates (5-8). In humans, the presence of neutralizing antibodies can predict disease  
77 severity and survival after primary SARS-CoV-2 infection (9) and correlates with protection from  
78 secondary infection (10, 11). Further, memory B cells induced by natural infection in humans may  
79 persist and, in some cases, continue to affinity mature for greater than 6 months after primary  
80 infection (12-15) providing potentially durable long-term protection. Comparable levels of  
81 neutralizing antibody titers were present in convalescent COVID-19 subjects and vaccine  
82 recipients (16-18) further supporting the role of adaptive immune responses in helping to control  
83 and prevent disease severity. Understanding the origins of these protective responses is critical.

84  
85 Both infection- and vaccine-elicited antibodies target the major envelope glycoprotein, spike,  
86 present on the virion surface (18). A substantial component of the neutralizing response engages  
87 the receptor binding domain (RBD) (19-24) and does so by sterically blocking interactions with  
88 the viral receptor ACE2 (25-30). Isolated RBD-directed monoclonal antibodies derive from  
89 diverse heavy- and light-chain variable gene segments suggesting that multiple biochemical  
90 solutions for developing RBD-directed antibodies are encoded within the human B-cell repertoire  
91 (19, 21, 24, 31). Potential immunogenicity of this antigenic site is based on the human naive B cell  
92 repertoire, and the overall frequency of naive BCRs that have some level of intrinsic affinity to  
93 stimulate their elicitation (32-35); in other words, to reliably amplify a protective SARS-CoV-2  
94 response through vaccination or infection, the appropriate naive B cells must be both present (i.e.,

95 precursor frequency) and activatable (i.e., above an affinity threshold). However, antigen-  
96 specificity of naive B cells is largely undefined. Here, we characterize the human naive B cell  
97 repertoire specific for the SARS-CoV-2 RBD from healthy individuals in order to understand their  
98 relative abundance, affinity, and potential for providing a protective (i.e., neutralizing) response  
99 after natural infection or vaccination.

100

101 To measure the reactivity of naive human B cells specific for the SARS-CoV-2 RBD we adapted  
102 an *ex vivo* B cell profiling approach used previously to study epitope-specific naive precursors  
103 targeting neutralizing sites on HIV (36-38) and influenza virus surface glycoproteins (32). We first  
104 designed a SARS-CoV-2 RBD construct that positions two glycans at residues 475 and 501 to  
105 selectively block binding to ACE2 and the receptor-binding motif (RBM)-directed antibody, B38  
106 (**fig. S1**) (39). Using this “ $\Delta$ RBM” probe, in addition to wildtype SARS-CoV-2 spike, and RBD  
107 probes, we isolated naive (CD19<sup>+</sup>/IgD<sup>+</sup>/IgG<sup>-</sup>) B cells specific to the RBD and, more finely, the  
108 RBM from the peripheral blood of 8 SARS-CoV-2 seronegative human donors (**Fig. 1A** and **fig.**  
109 **S2**). We defined RBM-specificity as B cells that bound to fluorescently labeled spike and RBD,  
110 but not the  $\Delta$ RBM probe (**fig. S3A**). Although rare, all 8 donors had detectable populations of  
111 RBM-specific naive B cells (**fig. S3B**). The median frequency of RBM-specific B cells among  
112 total and naive B cells was 0.0021% and 0.0023%, respectively (**Fig. 1B**). Within spike-reactive,  
113 naive cells, the median frequency of RBM-specific B cells was 3.2% (**Fig. 1C**); this potentially  
114 suggests that a large proportion of spike epitopes targeted by naive responses reside outside of the  
115 RBD. The majority of IgD<sup>+</sup> RBM-specific B cells were CD27<sup>-</sup> (mean frequency ~97%), in  
116 agreement with the naive B cell phenotype (**fig. S3C**).

117

118 To understand in more detail the properties of this naive repertoire, we obtained 163 paired heavy-  
119 and light-chain antibody sequences from 5 of the 8 donors (**Fig. 1D** and **fig. S4**). Sequence analysis  
120 showed that all clones were unique with diverse gene usage for both heavy and light chains and  
121 minimal gene pairing preferences (**fig. S4**). These data reflect the polyclonal gene usage observed  
122 in RBD-specific memory B cells sequenced from COVID-19 convalescent individuals (21, 24, 31)  
123 and vaccine recipients (18), suggesting that a diverse pool of antibody precursors can be activated  
124 upon antigen exposure. In comparing this naive repertoire to gene usage distribution from non-  
125 SARS-CoV-2-specific repertoires (40), we observed an increase in mean repertoire frequency of

126 ~20% for IGHV3-9 in 4 out of 5 sequenced donors (**fig. S5A**). Notably, this enrichment of IGHV3-  
127 9 was also observed in isolated memory B cells from convalescent individuals (41) and vaccine  
128 recipients (18), as well as in expanded IgG<sup>+</sup> B cells sequenced from a cohort of COVID-19 subjects  
129 during acute infection (31). These expanded clones detected shortly after symptom onset displayed  
130 low levels of somatic hypermutation (SHM) (31), suggesting potential IGHV3-9 usage in an early  
131 extrafollicular response in which naive B cells differentiate into short-lived plasma cells (42).  
132 Additionally, IGHV3-53 and 3-30 gene segments, over-represented in RBD-specific antibodies  
133 isolated from convalescent subjects (22, 30, 43), were recovered from three sequenced donors (13  
134 total clones; ~8.0% of total). The amino acid length of heavy and light chain third  
135 complementarity-determining regions (CDR3) ranged from 8 to 27 (average length ~16) for  
136 HCDR3 and 4 to 13 (average length ~10) for LCDR3 (**Fig. 1E**). These lengths are normally  
137 distributed relative to both unselected human repertoires (40, 44) and RBD-specific memory B  
138 cell repertoires (18, 21, 22, 24); this is in contrast to antibody precursors targeting the influenza  
139 and HIV receptor binding sites which have strict requirements for length (45) or gene usage (46,  
140 47). These data suggest that overall HCDR3 length does not restrict precursor frequency and there  
141 appears no inherent bias for CDR3 length conferring RBM-specificity. The majority of obtained  
142 sequences were at germline in both the variable heavy (V<sub>H</sub>) and light (V<sub>L</sub>) chains. However, despite  
143 sorting B cells with a naive phenotype, some sequences were recovered that deviated from  
144 germline. Specifically, the V<sub>H</sub> ranged from 91.4 to 100% identity to germline, with a median of  
145 99.7%; the V<sub>L</sub> ranged from 93.6 to 100%, with a median of 99.3% (**Fig. 1F**).

146  
147 To obtain affinities of the isolated naive antibodies, we cloned and recombinantly expressed 44  
148 IgGs selected to reflect the polyclonal RBD-specific repertoire with representatives from diverse  
149 variable region gene segments (**Table S1**). Additionally, we ensured diversity in terms of HCDR3  
150 length, kappa and lambda usage, as well as representation from all 5 donors. By ELISA, we  
151 identified IgGs with detectable binding to SARS-CoV-2 RBD; we summarize these results for all  
152 antibodies (**Fig. 2**) and parsed by donor (**fig. S6A**). Across 5 donors, 36 (~81%) bound to  
153 monomeric SARS-CoV-2 RBD (**Fig. 2A**) with EC<sub>50</sub> values ranging from 3.3 to 410 nM and a  
154 mean of 62 nM (**Fig. 2B** and **fig. S6A**). These antibodies included 32 unique variable heavy and  
155 light chain pairings (**Table S1**). We further defined the epitopic region of these IgGs using the  
156 ΔRBM construct and the individual glycan variants, Δ501 and Δ475, both of which independently

157 block ACE2 cell-surface binding but are on opposite sides of the RBM (**fig. S1E, F**). 11 IgGs had  
158 no detectable  $\Delta$ RBM binding (e.g., ab079, ab119), while 21 IgGs had reduced ELISA binding  
159 relative to wild-type RBD (**Fig. 2A, B**), reflected in the reduced  $\Delta$ RBM median  $EC_{50}$  values (**Fig.**  
160 **2C**). We also identified examples of antibodies sensitive to only  $\Delta$ 475 (e.g., ab185) and only  $\Delta$ 501  
161 (e.g., ab007) (**Fig. 2B** and **fig. S7**). Of the binding population, there is no apparent predisposition  
162 for HCDR3 length or light chain pairing (**Fig. 2 D, E**).

163  
164 We next asked whether these antibodies could recognize the SARS CoV-2 variant 501Y.V2  
165 currently circulating in South Africa (48). This variant includes a combination of the three RBD  
166 mutations: K417N, E484K, and N501Y (48). We find that 22 antibodies (50%) had detectable  
167 binding for this variant (**Fig. 2B**). Interestingly one antibody, ab033, seemed to be specific to this  
168 variant and did not bind SARS-CoV-2. We additionally tested the cross-reactivity of these  
169 antibodies to both SARS-CoV and WIV-1, related coronaviruses previously circulating and of  
170 pandemic potential (49), respectively. While the majority of antibodies (~86%) were specific to  
171 the SARS-CoV-2 RBD, 5 antibodies were also cross-reactive to both SARS-CoV and WIV-1. Of  
172 these cross-reactive antibodies, ab017 and ab114, derives from the same IGHV3-33 and IGVL2-  
173 14 paring but were isolated from different donors, suggesting a shared or public clonotype.  
174 Additionally, we found that ab189 was uniquely sensitive to the glycan at residue 475; this was  
175 surprising given the lack of conservation between of SARS-CoV, CoV-2 and WIV-1 RBMs,  
176 despite using the same ACE2 receptor (50). Collectively, these data demonstrate that coronavirus  
177 -specific naive antibodies are present in distinct donors, are of unrestricted gene usage and when  
178 as expressed as IgGs, have detectable affinity to RBDs from the currently administered vaccines,  
179 a circulating variant of concern, and from at least two related viruses.

180  
181 To obtain binding kinetics independent of avidity effects from bivalent IgGs, 11 antibodies were  
182 selected for expression as Fabs to determine monovalent binding affinity ( $K_{DS}$ ) by biolayer  
183 interferometry (BLI). Using monomeric RBD as the analyte, 9 of the 11 Fabs had detectable  
184 binding with  $K_{DS}$  ranging from ~6.5 to ~75  $\mu$ M; the other two remaining Fabs (ab177, ab185),  
185 gave unreliable affinity measurements (i.e., >100  $\mu$ M) (**fig. S8**). Notably, all Fabs had  
186 characteristically fast off rates ( $k_{off}$ ). This observation is consistent for germline B cells where fast  
187 off-rates are compensated by avidity due to overall BCR surface density (51); subsequent affinity

188 gains via somatic hypermutation often result in slowing of the off-rate and is a canonical  
189 mechanism of improved antigen binding (52-54). While the biologically relevant antigen affinities  
190 of naive B cells are uncertain, recent studies have suggested that B cell activation and affinity  
191 maturation is not restricted by immeasurably low affinity BCR interactions (55-57), thus the  
192 isolated naive antibodies described here, especially those with demonstrable affinity may very well  
193 be engaged and elicited upon antigen exposure.

194  
195 We next used a SARS-CoV-2 pseudovirus assay (9) to ask whether any of the isolated antibodies  
196 were capable of blocking transduction of target cells. We found that of the 36 RBD-binding  
197 antibodies tested in this assay, 5 had detectable levels of neutralization (~14%) (**Fig. 3A** and **fig.**  
198 **S9**). These neutralizing antibodies, obtained from multiple donors, have few commonalities with  
199 respect to their gene usages and HCDR3 lengths (**Fig. 3B**). While these naive antibodies were not  
200 as potent compared to the control antibody B38, isolated from a memory B cell (29), the  
201 observation, nevertheless, that the naive repertoire contains antibodies that have, at germline, the  
202 potential to neutralize is noteworthy.

203  
204 Here, we showed that isolated naive antibodies from 5 different donors can bind SARS-CoV-2  
205 RBD and its variant 501Y.V2, a proportion of which are cross-reactive to SARS CoV and WIV-  
206 1. These data suggest that RBM-specific precursors may be represented across a substantial  
207 fraction of individual human naive repertoires. This observation is consistent with longitudinal  
208 studies of SARS-CoV-2 infected individuals in which the majority of convalescent individuals  
209 seroconverted with detectable RBD serum antibodies and neutralization titers (14, 58). A subset  
210 of these germline antibodies already shows neutralization activity, albeit weakly, against SARS-  
211 CoV-2 pseudoviruses. They therefore have the potential to affinity mature into more potent  
212 neutralizing antibodies after vaccination or natural infection. Indeed, recent studies have  
213 characterized potent RBD-directed neutralizing antibodies with a limited level of somatic  
214 hypermutation (19, 21, 24, 31, 59). The naive antibodies characterized here engage epitopes across  
215 the RBM with a range of angles of approach as defined by our glycan variant probes; this is  
216 consistent with other RBD-targeting antibodies characterized by epitope-mapping, deep  
217 mutational scanning and structures (25, 27, 60) (**Fig. 4**). Having BCRs within the naive repertoire  
218 that recognize distinct or partially overlapping epitopes across the RBM may be advantageous in

219 eliciting protective responses to variants of SARS-CoV-2 (61-64). Collectively, our observations  
220 described here for SARS-CoV-2 are notably in contrast to other viruses such as HIV, whose  
221 germline precursors targeting its receptor binding site lack demonstrable affinity, are highly  
222 restricted in their gene usages and cannot at germline neutralize the virus (65-67). Future  
223 investigations aimed at understanding the naive repertoire with respect to coronaviruses of  
224 pandemic potential may reveal further commonalties in antigen-specific precursors, enabling the  
225 development of pan-coronavirus vaccines aimed at priming specific germline responses of  
226 protective potential.

227

## 228 **METHODS**

### 229 **Donor Samples**

230 PBMCs were isolated from blood donors obtained from the MGH blood donor center (8 donors  
231 total). Prior to donating blood, subjects were required to sign a donor attestation/consent statement,  
232 as per hospital requirements, stating “I give permission for my blood to be used for transfusion to  
233 patients or for research”. The gender and age are not recorded, however eligible donors are of at  
234 least 16 years old and weigh a minimum of 110lbs. All experiments were conducted with MGH  
235 Institutional Biosafety Committee approval (MGH protocol 2014B000035). Isolated PBMCs were  
236 used for B cell enrichment and single cell sorting (described below); plasma was aliquoted and  
237 stored at -80 °C until further use. Additionally, the control convalescent sera used for ELISA was  
238 obtained under the approved Partners Institutional Review Board (protocol 2020P000895) for use  
239 of patient samples for the development and validation of SARS-CoV-2 diagnostic tests (9).

240

### 241 **Expression and purification of recombinant CoV Antigens**

242 Plasmids encoding the receptor binding domains (RBDs) were designed based on GenBank  
243 sequences MN975262.1 (SARS-CoV-2), ABD72970.1 (SARS-CoV), and AGZ48828.1 (WIV-1).  
244 Constructs were codon optimized and synthesized by IDT. Glycosylation sites at SARS-CoV-2  
245 RBD residues 501 and/or 475 as well as 501Y.V2 mutations (K417N/E484K/N501Y) were  
246 inserted by QuikChange Mutagenesis (Agilent) following the manufacturer’s suggested protocol  
247 and were sequence confirmed (Genewiz). SARS-CoV-2 spike contained a C-terminal foldon  
248 trimerization domain and HRV 3C-cleavable 6xHis and 2xStrep II tags (68). All proteins were



249 transiently expressed in Expi293F cells (ThermoFisher). 5 to 7 days post-transfection, supernatants  
250 were harvested by centrifugation and further purified using immobilized metal affinity  
251 chromatography (IMAC) with cobalt-TALON resin (Takara) followed by Superdex 200 Increase  
252 10/300 GL size exclusion column (GE Healthcare).

253

#### 254 **Expression and purification IgGs and Fabs**

255 IgG and Fab genes for the heavy- and light-chain variable domains were synthesized and codon  
256 optimized by IDT and subcloned into pVRC protein expression vectors and sequence confirmed  
257 (Genewiz). Fabs and IgGs were similarly expressed and purified as described above for RBDs.  
258 IgGs were buffer exchanged into PBS while Fabs were concentrated and further purified by  
259 Superdex 200 Increase 10/300 GL size exclusion column.

260

#### 261 **ELISA**

262 Both sera and monoclonal antibody reactivity to CoV antigens were assayed by ELISA. Briefly,  
263 96-well plates (Corning) were coated with 5 µg/ml of monomeric RBDs diluted in PBS and  
264 incubated overnight at 4°C. Plates were blocked with 1% BSA in PBS containing 1% Tween-20  
265 (PBS-T) for 1hr at room temperature (RT). Blocking solution was discarded and 4-fold serial  
266 dilutions of human plasma (1:20 starting dilution) or isolated monoclonal antibodies (150 µg/ml  
267 starting concentration) in PBS were added to wells and incubated for 1hr at RT. Plates were then  
268 washed three times with PBS-T. Secondary, anti-human IgG-HRP (Abcam), was added to each  
269 well at 1:20,000 dilution in PBS-T and incubated for 1hr at RT. Plates were then washed three  
270 times with PBS-T and developed with 1-Step ABTS substrate (ThermoFisher) per manufacturer  
271 recommendations. Absorbance was measured using a plate reader at 405nm. EC<sub>50</sub> values were  
272 determined for monoclonal antibodies by non-linear regression (sigmoidal) using GraphPad Prism  
273 8.4.3 software. (GraphPad Software). ELISAs against 501Y.V2, SARS-CoV and WIV-1 RBDs  
274 were done at a single IgG concentration (150 µg/ml) in replicate. Positive binding was defined by  
275 an OD<sub>405</sub> ≥ 0.30.

276

### 277 **ACE-2 cell binding assay**

278 ACE-2 expressing 293T cells were incubated with 200 nM of RBD antigen in PBS for 1hr on ice.  
279 Cells were resuspended in 50 $\mu$ L of secondary stain containing streptavidin-PE (Invitrogen) at a  
280 1:200 dilution and incubated for 30 min on ice. Cell binding was analyzed by flow cytometry using  
281 a Stratadigm S1300Exi Flow Cytometer equipped with a 96 well plate high throughput sampler.  
282 Resulting data were analyzed using FlowJo (10.7.1).

283

### 284 **Probe Generation**

285 SARS-CoV-2 RBD and  $\Delta$ RBM constructs were expressed as dimeric murine-Fc (mFc; IgG1)  
286 fusion proteins containing a HRV 3C-cleavable C-terminal 8xHis and SBP tags and purified as  
287 described above. SBP-tagged RBD- and  $\Delta$ RBM-mFc dimers were individually mixed with  
288 fluorescently labeled streptavidin, SA-BV650 and SA-BV786 (BioLegend), to form RBD-mFc-  
289 BV650 and  $\Delta$ RBM-mFc-BV786 tetramers. SARS-CoV-2 spike with a C-terminal Strep II tag was  
290 labeled separately with StrepTactin PE and APC (IBA) to form spike-PE and -APC tetramers,  
291 respectively. Both labeling steps were performed for 30 min at 4 °C prior to sorting.

292

### 293 **Single B Cell Sorting**

294 Naive B cells were purified from PBMCs using the MACS Human B Cell isolation kit (Miltenyi  
295 Biotec) and incubated with 25nM of each SARS-CoV-2 probe (RBD-mFc-BV650,  $\Delta$ RBM-mFc-  
296 BV786, spike-PE, and spike-APC) for 30 min at 4°C. Cells were stained with anti-human CD19  
297 (Alexa-700), CD3 (PerCP-Cy5), IgD (PE-Cy7), IgG (BV711), CD27 (BV510), LiveDead Violet  
298 (Invitrogen), and Calciem (Invitrogen) for an additional 30 min. RBM-specific naive B cells,  
299 defined as CD19<sup>+</sup>/CD3<sup>-</sup>/IgG<sup>-</sup>/IgD<sup>+</sup>/spike PE<sup>+</sup>/spike APC<sup>+</sup>/RBD<sup>+</sup>/ $\Delta$ RBM<sup>-</sup>, were single-cell sorted  
300 using BD FACS Aria II (BD Biosciences) into 96-well plates containing lysis buffer supplemented  
301 with 1% BME. Within the CD19<sup>+</sup>/IgG<sup>-</sup>/IgD<sup>+</sup> gated cells, we also confirmed that 97% of the events  
302 were CD27 negative. Plates were stored at -80 °C for subsequent analysis. Flow cytometry data  
303 was analyzed using FlowJo software version 10.7.1.

304

### 305 **BCR Sequencing**

306 BCR Sequencing was carried out as described previously (32). Briefly, whole transcriptome  
307 amplification (WTA) was performed on the sorted cell-lysates according to the Smart-Seq2  
308 protocol (69). We then amplified heavy and light chain sequences from the WTA products utilizing  
309 pools of partially degenerate pools of V region specific primers (Qiagen HotStar Taq Plus). Heavy  
310 and light chain amplifications were carried out separately, with each pool containing pooled  
311 primers against human IGHV and heavy chain constant region genes, or human IGLV, IGKV, and  
312 light chain constant region genes. Cellular barcodes and index adapters (based on Nextera XT  
313 Index Adapters, Illumina Inc.) were added using a step-out PCR method. Amplicons were then  
314 pooled and sequenced using a 250x250 paired end 8x8 index reads on an Illumina Miseq System.  
315 The data were then demultiplexed, heavy and light chain reads were paired, and overlapping  
316 sequence reads were obtained (Panda-Seq) (70) and aligned against the human IMGT database  
317 (71).

318

### 319 **Interferometry binding experiments**

320 Interferometry experiments were performed using a BLItz instrument (ForteBio). Fabs (0.1 mg/ml)  
321 were immobilized on Ni-NTA biosensors. The SARS-CoV-2 RBD analyte was titrated (10 $\mu$ M,  
322 5 $\mu$ M, 2.5 $\mu$ M, and 1 $\mu$ M) to acquire binding affinities; the  $K_D$  was obtained through global fit of the  
323 titration curves by applying a 1:1 binding isotherm using vendor-supplied software.

324

### 325 **Pseudotyped Neutralization Assay**

326 SARS-CoV-2 neutralization was assessed using lentiviral particles pseudotyped as previously  
327 described (9, 72). Briefly, lentiviral particles were produced via transient transfection of 293T  
328 cells. The titers of viral supernatants were determined via flow cytometry on 293T-ACE2 cells  
329 (72) and via the HIV-1 p24<sup>CA</sup> antigen capture assay (Leidos Biomedical Research, Inc.). Assays  
330 were performed in 384-well plates (Grenier) using a Fluent Automated Workstation (Tecan). IgGs  
331 starting at 150  $\mu$ g/ml, were serially diluted (3-fold) in 20 $\mu$ L followed by addition of 20  $\mu$ L of  
332 pseudovirus containing 250 infectious units and incubated at room temperature for 1 hr. Finally,  
333 10,000 293T-ACE2 cells (72) in 20  $\mu$ L cell media containing 15  $\mu$ g/ml polybrene were added to  
334 each well and incubated at 37 °C for 60-72 hrs. Following transduction, cells were lysed using a  
335 previously described assay buffer (73) and shaken for 5 min prior to quantitation of luciferase  
336 expression using a Spectramax L luminometer (Molecular Devices). Percent neutralization was

337 determined by subtracting background luminescence measured from cells control wells (cells only)  
338 from sample wells and dividing by virus control wells (virus and cells only). Data were analyzed  
339 using Graphpad Prism.

340

#### 341 **Acknowledgements**

342 We thank members of the Schmidt and Lingwood Labs for helpful discussions, especially Timothy  
343 Caradonna and Daniel Maurer. We thank Goran Bajic for critical reading of the manuscript. We  
344 thank Samuel Kazer, James Gatter and Alex Shalek for BCR sequencing advice, Jason McLellan  
345 for the SARS-CoV-2 spike plasmid, and Nir Hacohen and Michael Farzan for ACE-2 expressing  
346 293T cells. We acknowledge support from NIH (R01AI146779, R01AI124378, R01AI137057,  
347 R01AI153098, R01AI155447, DP2DA042422, DP2DA040254, T32 AI007245), a Massachusetts  
348 Consortium on Pathogenesis Readiness (MassCPR) grant to A.G.S. and a MGH Transformative  
349 Scholars Program and Charles H. Hood Foundation to A.B.B.

350

#### 351 **Author Information**

352 **Author Contributions** J.F., J.B., A.B.B., D.L. A.G.S. designed research; J.F., J.B., K.S.D., E.C.L,  
353 B.M.H., L.R. M.S. T.B.M.,V.O., N.H., performed research; J.F., J.B., D.L. A.G.S analyzed data;  
354 J.F. and A.G.S. wrote the paper. J.F., J.B., B.M.H, A.B.B., D.L. A.G.S edited and commented on  
355 the paper.

356

357 **Correspondence and requests for materials should be addressed to:** Daniel Lingwood  
358 ([dlingwood@mgh.harvard.edu](mailto:dlingwood@mgh.harvard.edu)) or Aaron G. Schmidt ([aschmidt@crystal.harvard.edu](mailto:aschmidt@crystal.harvard.edu)).

359

360 **Competing financial interest:** No competing financial interests.

361

362 **FIGURES**

363

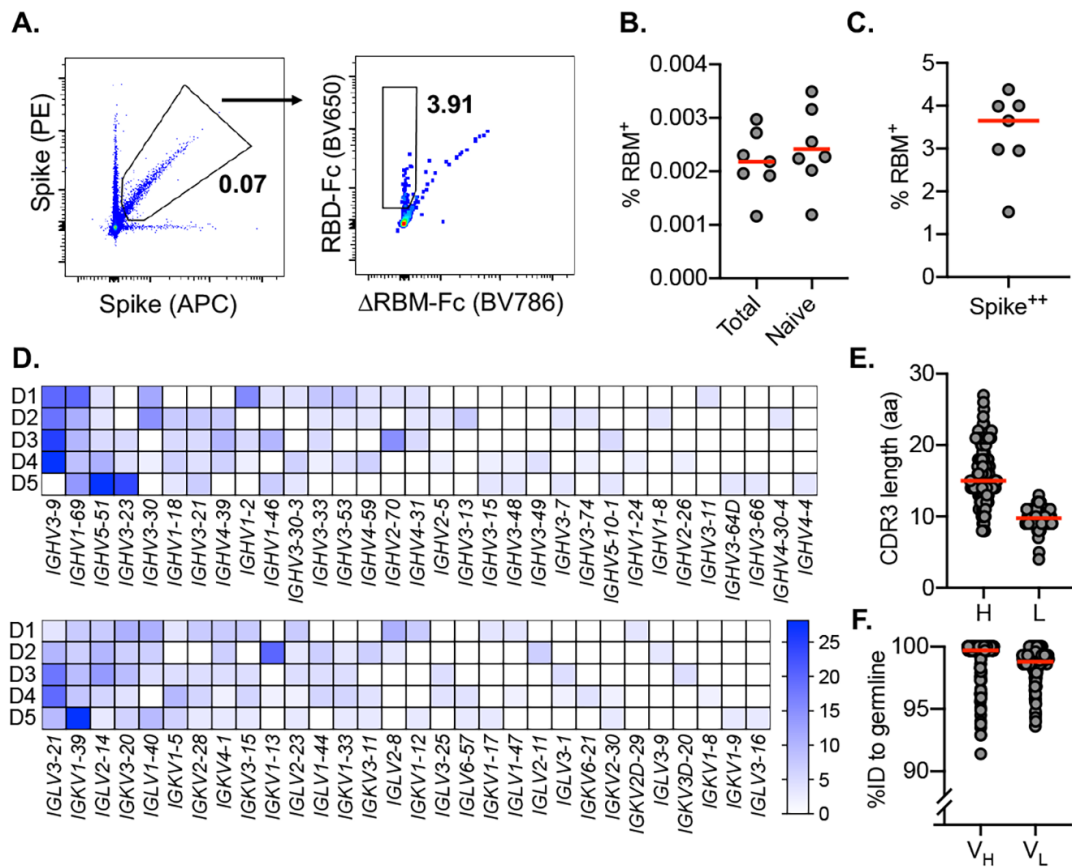

364

365

366 **Fig. 1. SARS-CoV-2-specific naive B cells isolation and characterization.** (A) RBM-specific  
 367 naive B cells from seronegative human donors were isolated by fluorescence-activated cell sorting  
 368 gated on CD19<sup>+</sup>IgD<sup>+</sup>IgG<sup>-</sup>; representative plot from donors 1 and 2 is shown.  $\Delta$ RBM is a sorting  
 369 probe with N-linked glycans at residues 501 and 475. RBM-specific B cell frequency among (B)  
 370 total, naive, and (C) spike-positive cells from each donor ( $n = 8$ ). (D) Heat map showing variable-  
 371 gene usage for all paired B cell sequences. Scale indicates percent of total sequences for each  
 372 donor separately. (E) Heavy (H) and light (L) CDR3 amino acid length distribution determined  
 373 using IMGT numbering. Red bars indicate median amino acid length. (F) Divergence from  
 374 inferred germline gene sequences. Red bars indicate the median percent values.

375

376

377

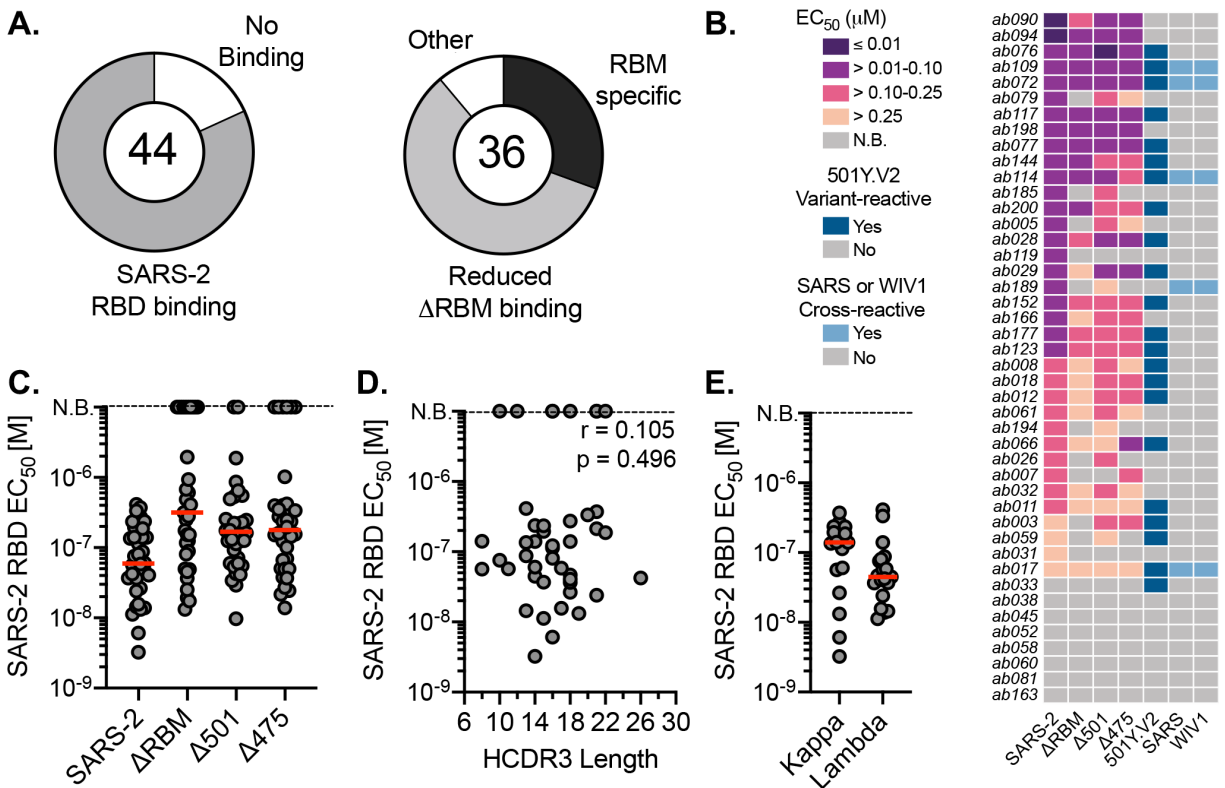

378

379

380

381 **Fig. 2. Binding properties and specificity of isolated naive antibodies.** (A) ELISA binding of

382 44 IgGs to SARS-CoV-2 RBD and  $\Delta$ RBM binding (left and right panels, respectively). 36 IgGs

383 with reduced  $\Delta$ RBM binding were defined by  $>1.5$  fold-change in ELISA  $EC_{50}$  relative to wild-

384 type RBD. (B) IgG binding to SARS-CoV-2 (wildtype and 501Y.V2), CoV-1, WIV-1 RBDs and

385 individual RBD glycan variants. (C) ELISA  $EC_{50}$  values for IgGs with detectable SARS-CoV-2

386 RBD binding ( $n = 36$ ). Red bars indicate the mean  $EC_{50}$  values. (D) Pearson correlation analysis

387 of SARS-CoV-2 RBD affinities and HCDR3 length. (E) ELISA  $EC_{50}$ s for IgGs based on kappa or

388 lambda gene usage.

389

390

391

392

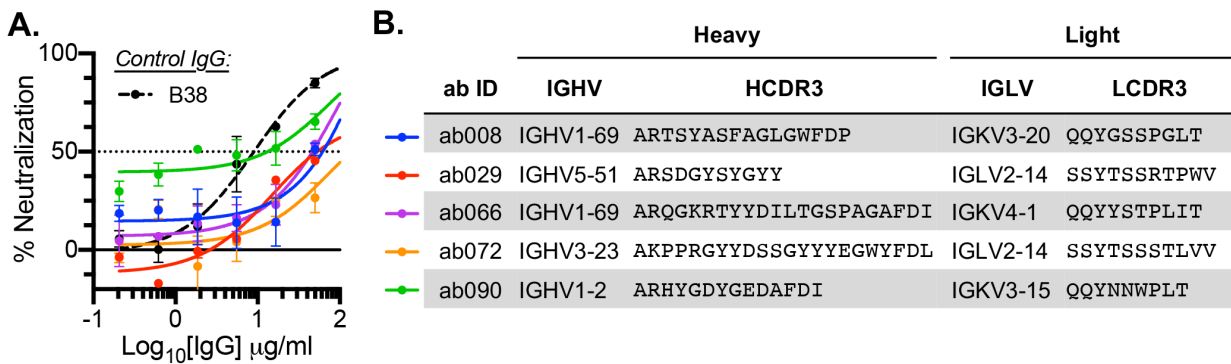

393

394

395 **Fig. 3. Naive antibodies neutralize SARS-CoV-2** (A) SARS-CoV-2 pseudovirus neutralization  
 396 assay for 5 IgGs. The neutralizing monoclonal antibody, B38, was used as a positive control.

397 Dashed lines indicate IC<sub>50</sub> values and data represent means ± SD of two technical replicates. (B)

398 Variable region gene usage and CDR3 sequences for the IgGs.

399

400

401

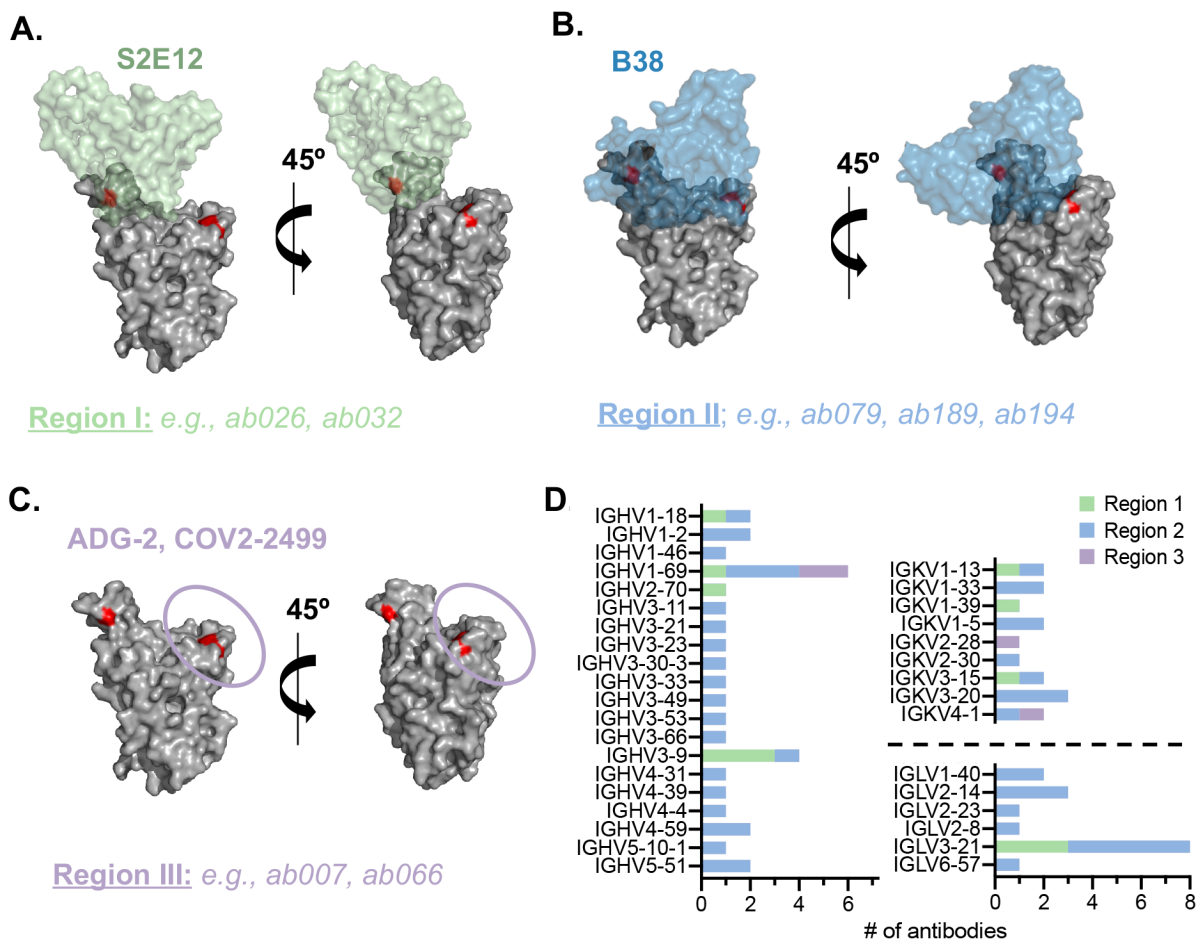

402

403

404 **Fig. 4. SARS-CoV-2 RBD-specific naive antibodies and their epitope specificity.** (A) Epitopic  
 405 Region I defined by loss of binding to  $\Delta 475$ ; structure of RBM-directed S2E12 (PDB 7K4N) and  
 406 representative naive IgGs (*italics*) in this study shown. (B) Epitopic Region II, defined by loss of  
 407 binding to  $\Delta$ RBM but neither single glycan variant alone; structure of RBM-directed B38 (PDB  
 408 7BZ5) and representative naive IgGs. (C) Epitopic Region III, defined by loss of binding to  $\Delta 501$   
 409 with representative naive IgGs (no structure is presently available to define this region). (D)  
 410 Summary of gene usage of isolated naive antibodies from each Region (A-C); bars represent total  
 411 number of antibodies and color-coded by each Region.

412

413

414



## 415 REFERENCES

- 416 1. N. E. Harwood, F. D. Batista, Early events in B cell activation. *Annual review of immunology* **28**,  
417 185-210 (2009).
- 418 2. G. D. Victora, M. C. Nussenzweig, Germinal centers. *Annual review of immunology* **30**, 429-457  
419 (2012).
- 420 3. C. Havenar-Daughton, R. K. Abbott, W. R. Schief, S. Crotty, When designing vaccines, consider  
421 the starting material: the human B cell repertoire. *Current opinion in immunology* **53**, 209-216  
422 (2018).
- 423 4. F. Sallusto, A. Lanzavecchia, K. Araki, R. Ahmed, From vaccines to memory and back. *Immunity*  
424 **33**, 451-463 (2010).
- 425 5. W. Deng *et al.*, Primary exposure to SARS-CoV-2 protects against reinfection in rhesus macaques.  
426 *Science* **369**, 818-823 (2020).
- 427 6. A. Chandrashekar *et al.*, SARS-CoV-2 infection protects against rechallenge in rhesus macaques.  
428 *Science*, (2020).
- 429 7. N. B. Mercado *et al.*, Single-shot Ad26 vaccine protects against SARS-CoV-2 in rhesus macaques.  
430 *Nature* **586**, 583-588 (2020).
- 431 8. Q. Gao *et al.*, Development of an inactivated vaccine candidate for SARS-CoV-2. *Science* **369**, 77-  
432 81 (2020).
- 433 9. W. F. Garcia-Beltran *et al.*, COVID-19 neutralizing antibodies predict disease severity and  
434 survival. *Cell*, (2020).
- 435 10. A. Addetia *et al.*, Neutralizing Antibodies Correlate with Protection from SARS-CoV-2 in Humans  
436 during a Fishery Vessel Outbreak with a High Attack Rate. *Journal of Clinical Microbiology* **58**,  
437 e02107-02120 (2020).
- 438 11. S. F. Lumley *et al.*, Antibodies to SARS-CoV-2 are associated with protection against reinfection.  
439 *medRxiv*, 2020.2011.2018.20234369 (2020).
- 440 12. A. Sokal *et al.*, Maturation and persistence of the anti-SARS-CoV-2 memory B cell response.  
441 *bioRxiv*, 2020.2011.2017.385252 (2020).
- 442 13. C. Gaebler *et al.*, Evolution of antibody immunity to SARS-CoV-2. *Nature*, (2021).
- 443 14. J. M. Dan *et al.*, Immunological memory to SARS-CoV-2 assessed for up to 8 months after  
444 infection. *Science*, eabf4063 (2021).
- 445 15. L. B. Rodda *et al.*, Functional SARS-CoV-2-specific immune memory persists after mild COVID-  
446 19. *Cell*, (2020).
- 447 16. E. J. Anderson *et al.*, Safety and immunogenicity of SARS-CoV-2 mRNA-1273 vaccine in older  
448 adults. *New England Journal of Medicine*, (2020).
- 449 17. E. E. Walsh *et al.*, Safety and Immunogenicity of Two RNA-Based Covid-19 Vaccine Candidates.  
450 *New England Journal of Medicine* **383**, 2439-2450 (2020).
- 451 18. Z. Wang *et al.*, mRNA vaccine-elicited antibodies to SARS-CoV-2 and circulating variants.  
452 *bioRxiv*, 2021.2001.2015.426911 (2021).
- 453 19. P. J. M. Brouwer *et al.*, Potent neutralizing antibodies from COVID-19 patients define multiple  
454 targets of vulnerability. *Science* **369**, 643-650 (2020).
- 455 20. B. Ju *et al.*, Human neutralizing antibodies elicited by SARS-CoV-2 infection. *Nature* **584**, 115-  
456 119 (2020).
- 457 21. C. Kreer *et al.*, Longitudinal isolation of potent near-germline SARS-CoV-2-neutralizing  
458 antibodies from COVID-19 patients. *Cell* **182**, 843-854. e812 (2020).
- 459 22. D. F. Robbiani *et al.*, Convergent antibody responses to SARS-CoV-2 in convalescent individuals.  
460 *Nature* **584**, 437-442 (2020).
- 461 23. A. Z. Wec *et al.*, Broad neutralization of SARS-related viruses by human monoclonal antibodies.  
462 *Science* **369**, 731-736 (2020).
- 463 24. S. J. Zost *et al.*, Rapid isolation and profiling of a diverse panel of human monoclonal antibodies  
464 targeting the SARS-CoV-2 spike protein. *Nature Medicine* **26**, 1422-1427 (2020).

- 465 25. C. O. Barnes *et al.*, SARS-CoV-2 neutralizing antibody structures inform therapeutic strategies.  
466 *Nature*, (2020).
- 467 26. C. O. Barnes *et al.*, Structures of Human Antibodies Bound to SARS-CoV-2 Spike Reveal  
468 Common Epitopes and Recurrent Features of Antibodies. *Cell* **182**, 828-842.e816 (2020).
- 469 27. L. Piccoli *et al.*, Mapping Neutralizing and Immunodominant Sites on the SARS-CoV-2 Spike  
470 Receptor-Binding Domain by Structure-Guided High-Resolution Serology. *Cell* **183**, 1024-  
471 1042.e1021 (2020).
- 472 28. R. Shi *et al.*, A human neutralizing antibody targets the receptor binding site of SARS-CoV-2.  
473 *Nature*, 1-8 (2020).
- 474 29. Y. Wu *et al.*, A noncompeting pair of human neutralizing antibodies block COVID-19 virus binding  
475 to its receptor ACE2. *Science* **368**, 1274-1278 (2020).
- 476 30. M. Yuan *et al.*, Structural basis of a shared antibody response to SARS-CoV-2. *Science* **369**, 1119-  
477 1123 (2020).
- 478 31. S. C. A. Nielsen *et al.*, Human B Cell Clonal Expansion and Convergent Antibody Responses to  
479 SARS-CoV-2. *Cell Host & Microbe* **28**, 516-525.e515 (2020).
- 480 32. M. Sangesland *et al.*, Germline-encoded affinity for cognate antigen enables vaccine amplification  
481 of a human broadly neutralizing response against influenza virus. *Immunity* **51**, 735-749. e738  
482 (2019).
- 483 33. P. Dosenovic *et al.*, Anti-HIV-1 B cell responses are dependent on B cell precursor frequency and  
484 antigen-binding affinity. *Proceedings of the National Academy of Sciences*, 201803457 (2018).
- 485 34. R. K. Abbott *et al.*, Precursor frequency and affinity determine B cell competitive fitness in  
486 germinal centers, tested with germline-targeting HIV vaccine immunogens. *Immunity* **48**, 133-146.  
487 e136 (2018).
- 488 35. A. Amitai *et al.*, Defining and Manipulating B cell Immunodominance Hierarchies to Elicit Broadly  
489 Neutralizing Antibody Responses Against Influenza Virus. *Cell Systems* **11**, 573-588. e579 (2020).
- 490 36. C. Havenar-Daughton *et al.*, The human naive B cell repertoire contains distinct subclasses for a  
491 germline-targeting HIV-1 vaccine immunogen. *Science translational medicine* **10**, eaat0381  
492 (2018).
- 493 37. J. G. Jardine *et al.*, HIV-1 broadly neutralizing antibody precursor B cells revealed by germline-  
494 targeting immunogen. *Science* **351**, 1458-1463 (2016).
- 495 38. J. M. Steichen *et al.*, A generalized HIV vaccine design strategy for priming of broadly neutralizing  
496 antibody responses. *Science* **366**, (2019).
- 497 39. B. M. Hauser *et al.*, Engineered receptor binding domain immunogens elicit pan-coronavirus  
498 neutralizing antibodies. *bioRxiv*, 2020.2012.2007.415216 (2020).
- 499 40. B. Briney, A. Inderbitzin, C. Joyce, D. R. Burton, Commonality despite exceptional diversity in  
500 the baseline human antibody repertoire. *Nature* **566**, 393-397 (2019).
- 501 41. B. Ju *et al.*, Human neutralizing antibodies elicited by SARS-CoV-2 infection. *Nature* **584**, 115-  
502 119 (2020).
- 503 42. I. C. MacLennan *et al.*, Extrafollicular antibody responses. *Immunological reviews* **194**, 8-18  
504 (2003).
- 505 43. Y. Cao *et al.*, Potent Neutralizing Antibodies against SARS-CoV-2 Identified by High-Throughput  
506 Single-Cell Sequencing of Convalescent Patients' B Cells. *Cell* **182**, 73-84.e16 (2020).
- 507 44. C. Soto *et al.*, High frequency of shared clonotypes in human B cell receptor repertoires. *Nature*  
508 **566**, 398-402 (2019).
- 509 45. A. G. Schmidt *et al.*, Viral receptor-binding site antibodies with diverse germline origins. *Cell* **161**,  
510 1026-1034 (2015).
- 511 46. T. Zhou *et al.*, Multidonor analysis reveals structural elements, genetic determinants, and  
512 maturation pathway for HIV-1 neutralization by VRC01-class antibodies. *Immunity* **39**, 245-258  
513 (2013).

- 514 47. A. P. West, R. Diskin, M. C. Nussenzweig, P. J. Bjorkman, Structural basis for germ-line gene  
515 usage of a potent class of antibodies targeting the CD4-binding site of HIV-1 gp120. *Proceedings*  
516 *of the National Academy of Sciences* **109**, E2083-E2090 (2012).
- 517 48. H. Tegally *et al.*, Emergence and rapid spread of a new severe acute respiratory syndrome-related  
518 coronavirus 2 (SARS-CoV-2) lineage with multiple spike mutations in South Africa. *medRxiv*,  
519 2020.2012.2021.20248640 (2020).
- 520 49. V. D. Menachery *et al.*, SARS-like WIV1-CoV poised for human emergence. *Proceedings of the*  
521 *National Academy of Sciences* **113**, 3048-3053 (2016).
- 522 50. C. G. Rappazzo *et al.*, Broad and potent activity against SARS-like viruses by an engineered human  
523 monoclonal antibody. *Science*, eabf4830 (2021).
- 524 51. D. Lingwood *et al.*, Structural and genetic basis for development of broadly neutralizing influenza  
525 antibodies. *Nature* **489**, 566 (2012).
- 526 52. A. G. Schmidt *et al.*, Immunogenic stimulus for germline precursors of antibodies that engage the  
527 influenza hemagglutinin receptor-binding site. *Cell reports* **13**, 2842-2850 (2015).
- 528 53. F. D. Batista, M. S. Neuberger, Affinity dependence of the B cell response to antigen: a threshold,  
529 a ceiling, and the importance of off-rate. *Immunity* **8**, 751-759 (1998).
- 530 54. J. M. Tas *et al.*, Visualizing antibody affinity maturation in germinal centers. *Science* **351**, 1048-  
531 1054 (2016).
- 532 55. C. Viant *et al.*, Antibody Affinity Shapes the Choice between Memory and Germinal Center B Cell  
533 Fates. *Cell* **183**, 1298-1311. e1211 (2020).
- 534 56. R. Di Niro *et al.*, Salmonella infection drives promiscuous B cell activation followed by  
535 extrafollicular affinity maturation. *Immunity* **43**, 120-131 (2015).
- 536 57. M. Kuraoka *et al.*, Complex antigens drive permissive clonal selection in germinal centers.  
537 *Immunity* **44**, 542-552 (2016).
- 538 58. D. Stadlbauer *et al.*, Repeated cross-sectional sero-monitoring of SARS-CoV-2 in New York City.  
539 *Nature*, 1-5 (2020).
- 540 59. S. I. Kim *et al.*, Stereotypic neutralizing VH antibodies against SARS-CoV-2 spike protein receptor  
541 binding domain in COVID-19 patients and healthy individuals. *Science Translational Medicine*,  
542 (2021).
- 543 60. A. J. Greaney *et al.*, Complete Mapping of Mutations to the SARS-CoV-2 Spike Receptor-Binding  
544 Domain that Escape Antibody Recognition. *Cell Host & Microbe*, (2020).
- 545 61. A. J. Greaney *et al.*, Comprehensive mapping of mutations to the SARS-CoV-2 receptor-binding  
546 domain that affect recognition by polyclonal human serum antibodies. *bioRxiv*, 2020.2012.  
547 2031.425021 (2021).
- 548 62. A. S. Luring, E. B. Hodcroft, Genetic Variants of SARS-CoV-2—What Do They Mean? *JAMA*,  
549 (2021).
- 550 63. N. G. Davies *et al.*, Estimated transmissibility and severity of novel SARS-CoV-2 Variant of  
551 Concern 202012/01 in England. *medRxiv*, (2020).
- 552 64. H. Tegally *et al.*, Emergence and rapid spread of a new severe acute respiratory syndrome-related  
553 coronavirus 2 (SARS-CoV-2) lineage with multiple spike mutations in South Africa. *medRxiv*,  
554 (2020).
- 555 65. S. Hoot *et al.*, Recombinant HIV envelope proteins fail to engage germline versions of anti-CD4bs  
556 bNAbs. *PLoS Pathog* **9**, e1003106 (2013).
- 557 66. J. F. Scheid *et al.*, Sequence and structural convergence of broad and potent HIV antibodies that  
558 mimic CD4 binding. *Science* **333**, 1633-1637 (2011).
- 559 67. T. Zhou *et al.*, Structural basis for broad and potent neutralization of HIV-1 by antibody VRC01.  
560 *Science* **329**, 811-817 (2010).
- 561 68. D. Wrapp *et al.*, Cryo-EM structure of the 2019-nCoV spike in the prefusion conformation. *Science*  
562 **367**, 1260-1263 (2020).
- 563 69. J. J. Trombetta *et al.*, Preparation of single-cell RNA-seq libraries for next generation sequencing.  
564 *Current protocols in molecular biology* **107**, 4.22. 21-24.22. 17 (2014).

- 565 70. A. P. Masella, A. K. Bartram, J. M. Truszkowski, D. G. Brown, J. D. Neufeld, PANDAseq: paired-  
566 end assembler for illumina sequences. *BMC bioinformatics* **13**, 1-7 (2012).  
567 71. B. Shi *et al.*, Comparative analysis of human and mouse immunoglobulin variable heavy regions  
568 from IMGT/LIGM-DB with IMGT/HighV-QUEST. *Theoretical Biology and Medical Modelling*  
569 **11**, 1-11 (2014).  
570 72. M. J. Moore *et al.*, Retroviruses pseudotyped with the severe acute respiratory syndrome  
571 coronavirus spike protein efficiently infect cells expressing angiotensin-converting enzyme 2.  
572 *Journal of virology* **78**, 10628-10635 (2004).  
573 73. E. Siebring-van Olst *et al.*, Affordable luciferase reporter assay for cell-based high-throughput  
574 screening. *Journal of biomolecular screening* **18**, 453-461 (2013).  
575

576  
577  
578  
579  
580  
581  
582  
583  
584  
585  
586  
587  
588  
589  
590  
591  
592  
593  
594  
595  
596  
597  
598  
599  
600  
601

## Supplementary Information

### **Naive human B cells can neutralize SARS-CoV-2 through recognition of its receptor binding domain**

Jared Feldman<sup>1\*</sup>, Julia Bals<sup>1\*</sup>, Kerri St. Denis<sup>1</sup>, Evan C. Lam<sup>1</sup>, Blake M. Hauser<sup>1</sup>, Larance Ronsard<sup>1</sup>, Maya Sangesland<sup>1</sup>, Thalia Bracamonte Moreno<sup>1</sup>, Vintus Okonkwo<sup>1</sup>, Nathania Hartojo<sup>1</sup>, Alejandro B. Balazs<sup>1</sup>, Daniel Lingwood<sup>1#</sup> and Aaron G. Schmidt<sup>1,2#</sup>

<sup>1</sup>Ragon Institute of MGH, MIT and Harvard, Cambridge, MA, 02139, USA

<sup>2</sup>Department of Microbiology, Harvard Medical School, Boston, MA 02115, USA

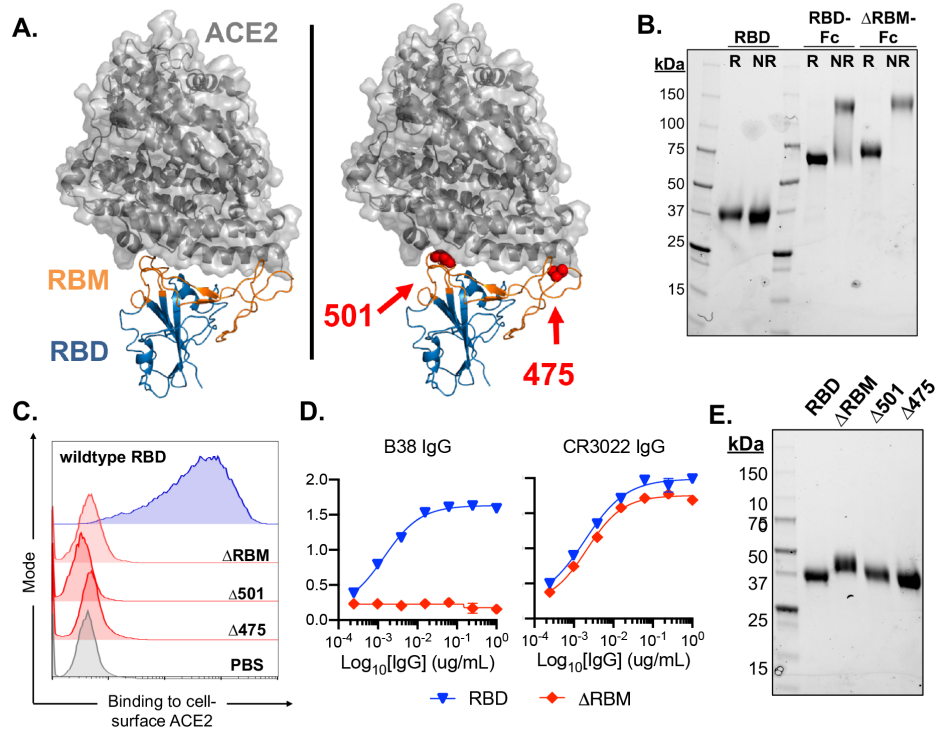

602

603

604 **fig. S1. Design and characterization of SARS-CoV-2 antigens.** (A) SARS-CoV-2 RBD in  
 605 complex with viral receptor, ACE2 shown in blue and grey, respectively (PDB 6M0J). Wild-type  
 606 RBD with, the receptor binding motif (RBM), shown in orange (left panel). Structural model of  
 607 the  $\Delta$ RBM probe designed to abrogate binding to ACE2 (right panel). Putative N-linked  
 608 glycosylation sites engineered onto the RBM are shown in red spheres at amino acid positions 501  
 609 and 475. (B) SDS-PAGE gel under reducing (R) and non-reducing (NR) conditions for monomeric  
 610 RBD, RBD-Fc and  $\Delta$ RBM-Fc. (C) Wildtype RBD,  $\Delta$ RBM and single glycan variant binding to  
 611 ACE2-expressing 293T cells by flow cytometry. Wild-type RBD binding shown in blue, glycan  
 612 variant binding shown in red. Streptavidin-PE was used to detect the relative intensity of antigen  
 613 binding to cell-surface ACE2. A PBS control (gray) indicates secondary-only staining. (D) Control  
 614 antibody ELISA binding to RBD and  $\Delta$ RBM antigens. RBM-specific antibody, B38 (left). Non-  
 615 RBM-specific control antibody, CR3022 (right). (E)  $\Delta$ RBM and  $\Delta$ 501 and  $\Delta$ 475 variants analyzed  
 616 by SDS-PAGE gel under reducing conditions; wildtype RBD is shown for comparison.

617

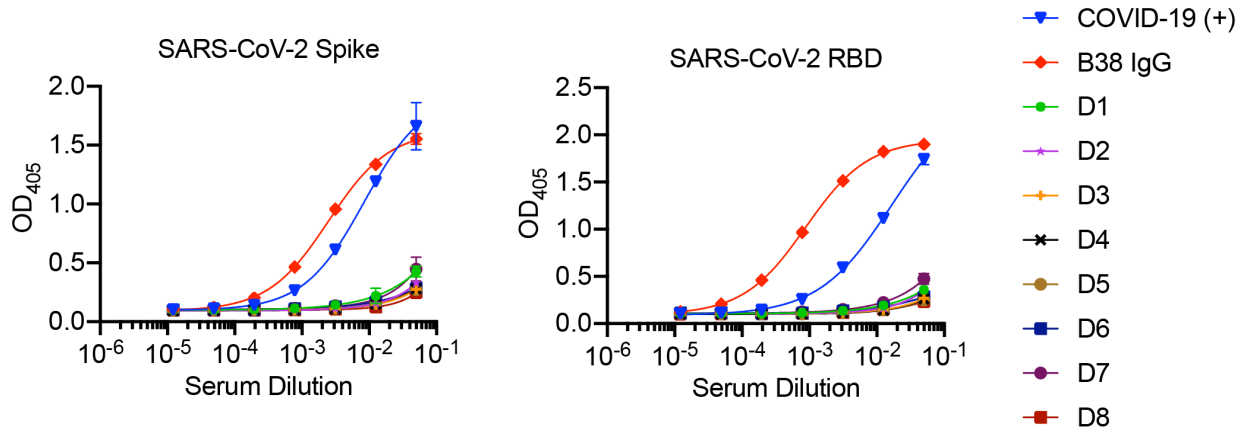

618

619

620 **fig. S2. ELISA binding reactivity of healthy donor sera to SARS-CoV-2 spike and RBD.**

621 Seronegative donors 1-8 were single-cell B sorted to isolate RBD-specific naive B cells. Sera from  
622 a COVID-19 convalescent patient and control antibody, B38, were included as positive controls.

623

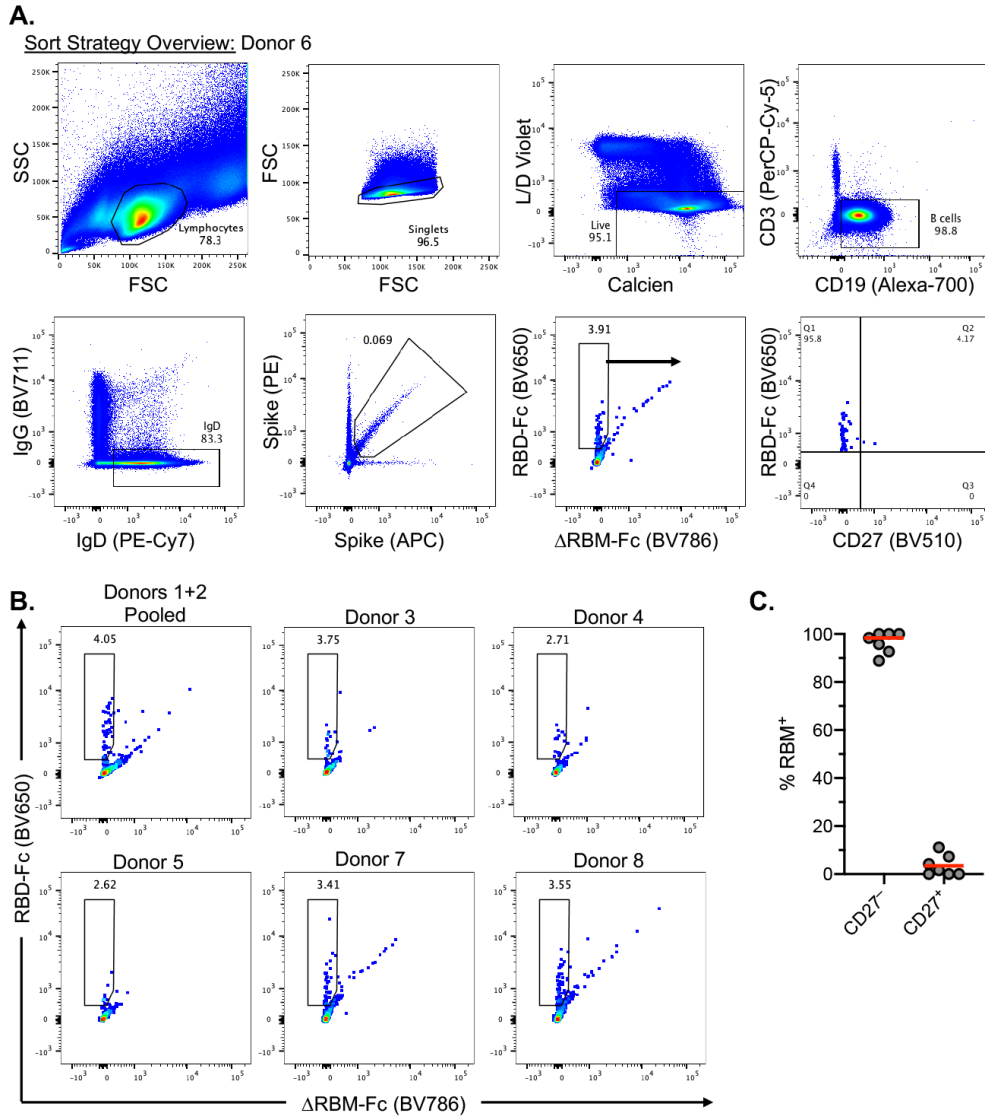

624

625

626 **fig. S3. PBMC flow cytometry analyses.** (A) Representative gating strategy used for FACS of  
 627 PBMCs pooled from donors 1 and 2. Gating was on naive B cells defined by single living  
 628 lymphocytes that were CD19<sup>+</sup>CD3<sup>-</sup>IgD<sup>+</sup>IgG<sup>-</sup>. Sorted cells were RBM-specific as defined by spike-  
 629 PE<sup>+</sup>/spike-APC<sup>+</sup>/RBD-Fc-BV650<sup>+</sup>/ $\Delta$ RBM-Fc-BC650<sup>-</sup>. Sort gate is denoted by the blue arrow. The  
 630 bottom right plot shows CD27 staining of sorted RBM-specific naive B cells. (B) Flow cytometry  
 631 showing the sort gate and percentage of RBM-specific B cells for the remaining 6 healthy human  
 632 donors. (C) RBM-specific B cell frequency among CD27<sup>+</sup> and CD27<sup>-</sup> cells. Each symbol  
 633 represents a different donor ( $n = 8$ ).

634



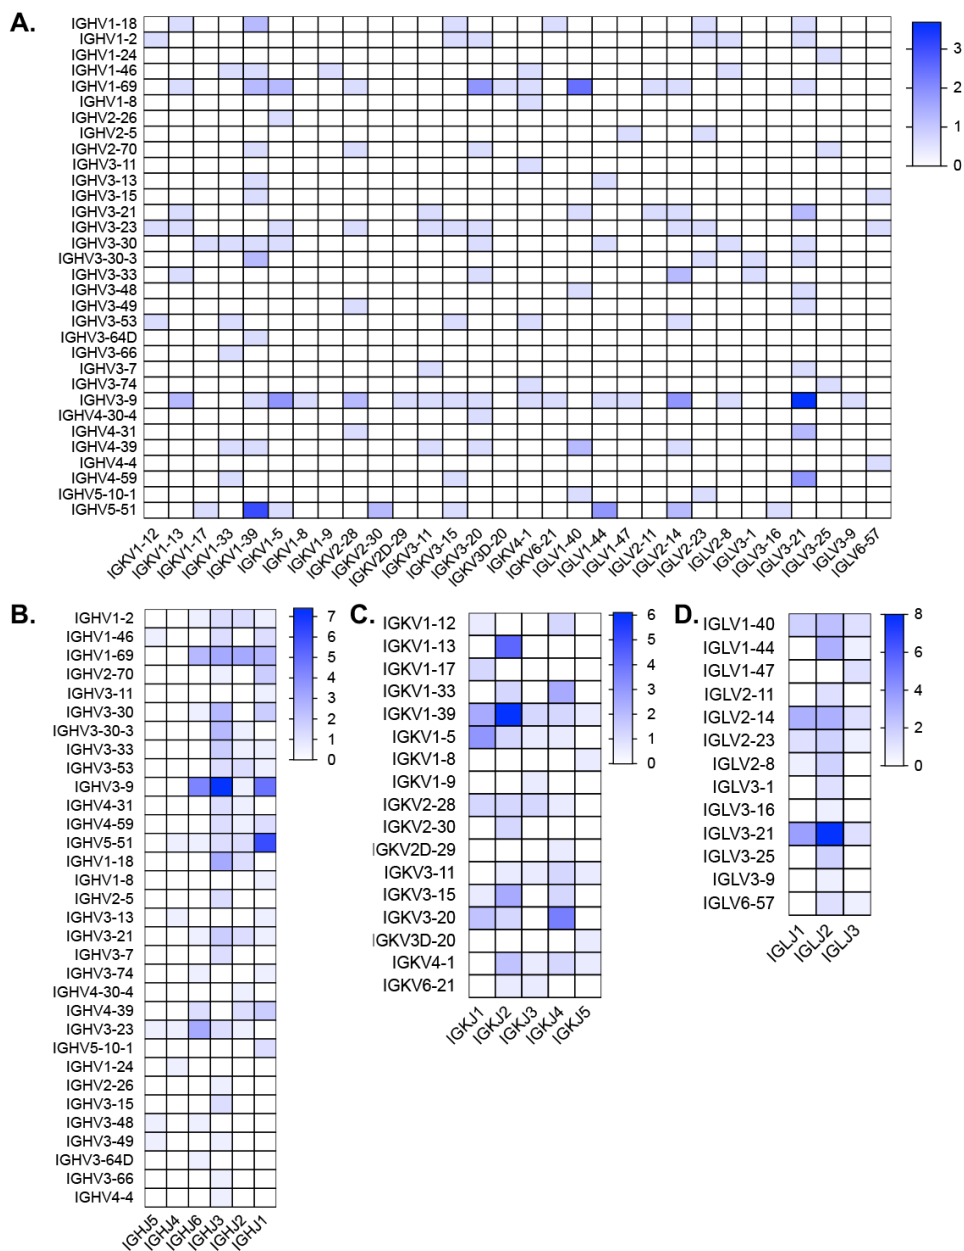

635  
 636  
 637  
 638  
 639 **fig. S4. Variable-gene usage of isolated naive antibodies.** (A) Heatmap showing frequency of  
 640  $V_H:V_L$  pairing. Overall frequency of variable (V) and joining (J) genes for (B) heavy chains, (C)  
 641 kappa light chains, and (D) lambda light chains. Heatmap scales represent percent of total paired  
 642 sequences.

643

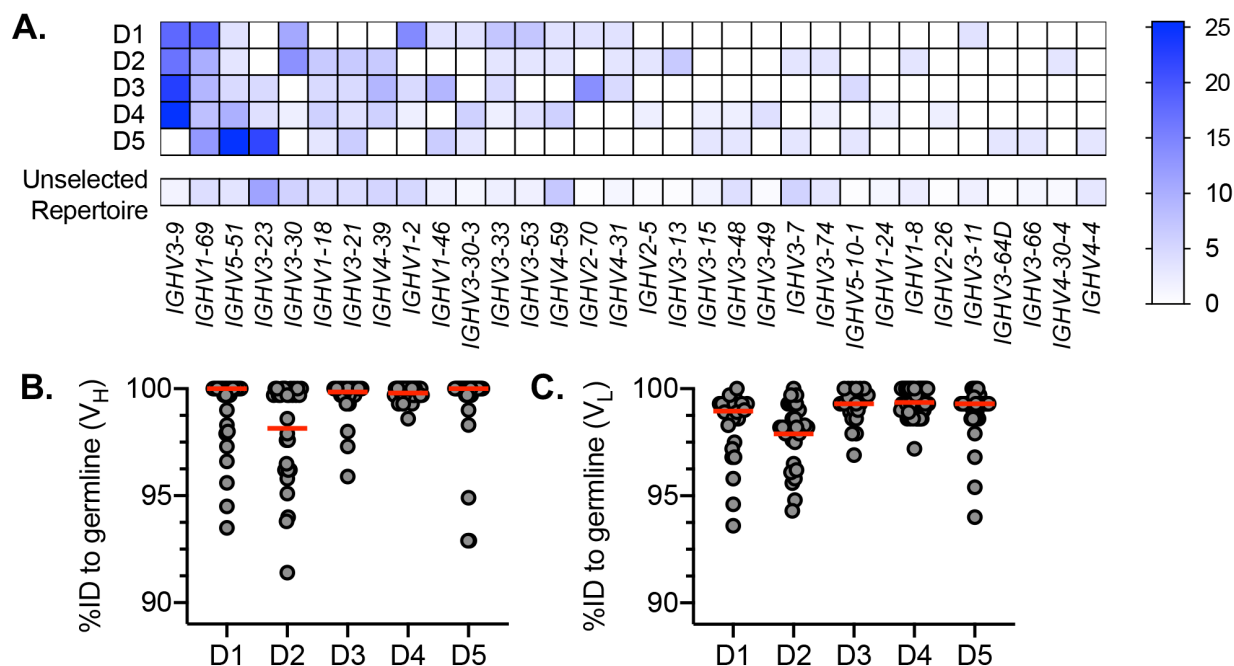

644

645

646 **fig. S5. Repertoire comparison and germline identity by individual donor.** (A) Heatmap  
 647 showing  $V_H$ -gene usage of isolated antibodies derived from donors 1-5. Unselected repertoire gene  
 648 usage derive from a high-throughput sequencing data set of circulating B cells across 10 human  
 649 subjects (*I*). Heatmap scale represent percent of total paired sequence from each donor.  
 650 Divergence from inferred germline gene sequences separated by individual donor for (B)  $V_H$  and  
 651 (C)  $V_L$ . Red bars indicate the median percent values, and each dot represents an individual paired  
 652 sequence.

653

654

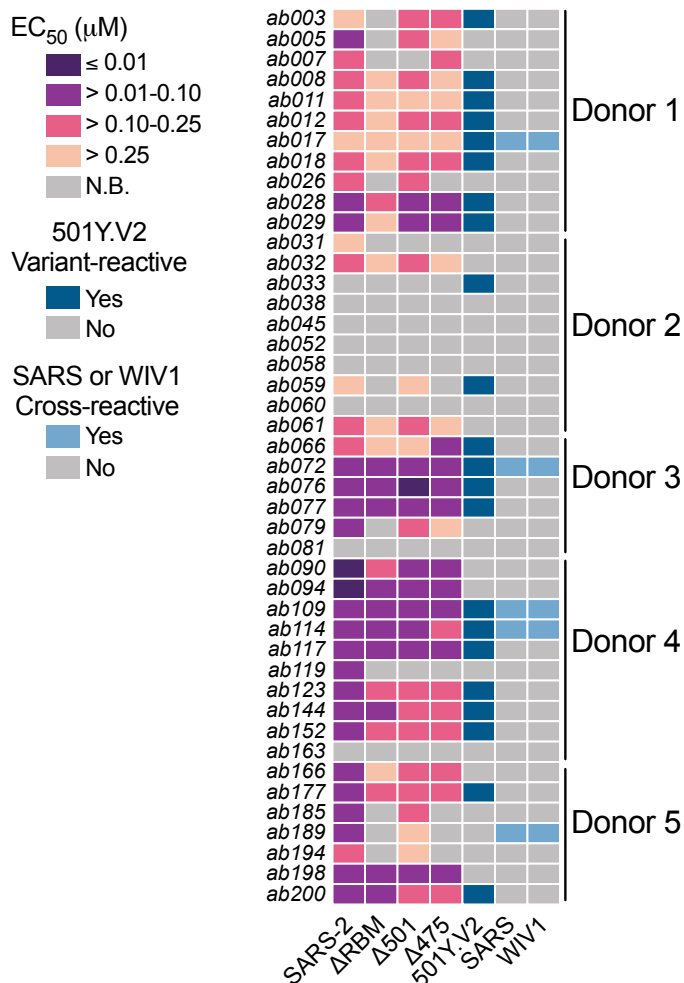

655

656

657

658 **fig. S6. ELISA specificity for isolated naive antibodies related to Figure 2.** Heatmap showing

659 IgG binding to RBDs ( $n = 44$ ) sorted by donor.

660

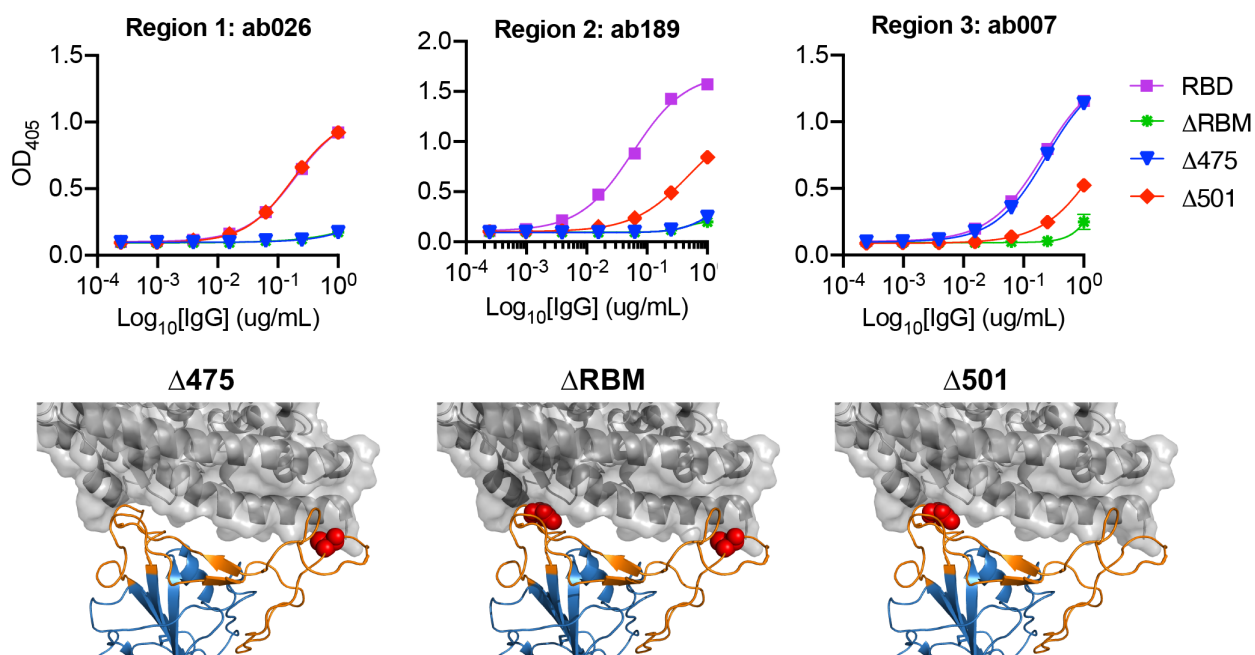

661  
662  
663  
664  
665  
666  
667  
668  
669

**fig. S7. RBD glycan variant binding by ELISA.** Representative examples of epitopic regions as defined by patterns of RBD glycan variant binding by ELISA. Region 1 refers to IgGs with reduced binding to  $\Delta 475$ , region 2 refers to IgGs with reduced binding to both glycan variants, and region 3 refers to IgGs with reduced binding to  $\Delta 501$ .

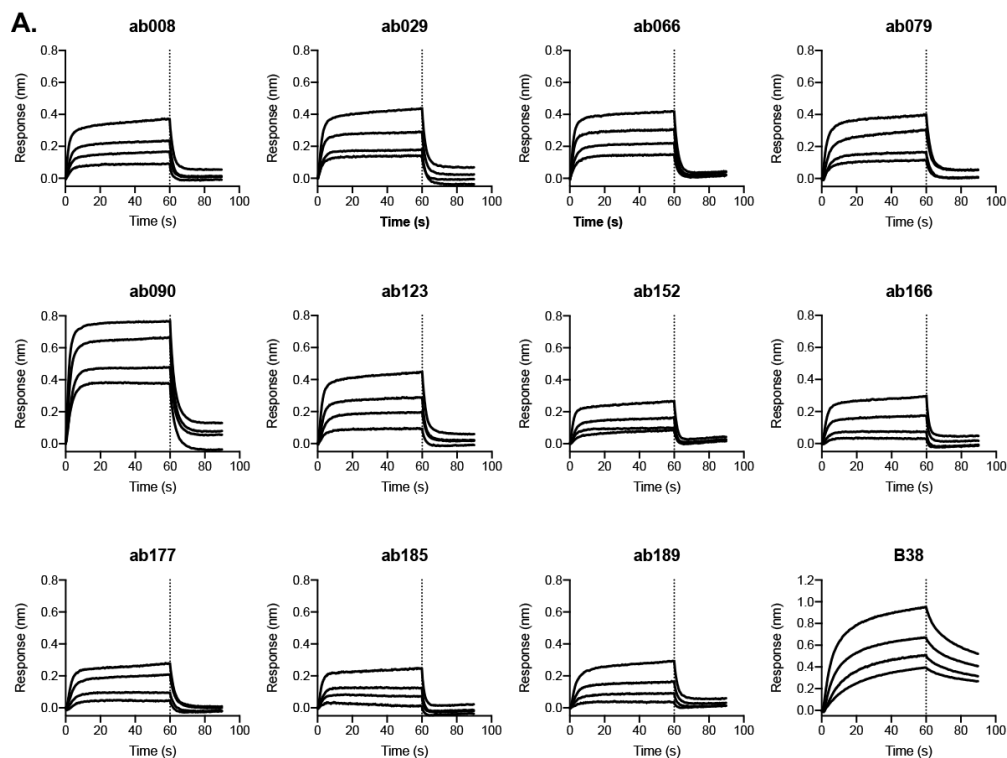

**B.**

| Naive IgG | IGHV       | IGLV     | $K_D$ ( $\mu\text{M}$ ) | $K_a$ ( $10^3$ ) ( $\text{M}^{-1}\text{s}^{-1}$ ) | $K_{off}$ ( $10^{-1}$ ) ( $\text{s}^{-1}$ ) |
|-----------|------------|----------|-------------------------|---------------------------------------------------|---------------------------------------------|
| B38       | IGHV3-53   | IGKV1-9  | 2.1                     | 10.21                                             | 0.21                                        |
| ab090     | IGHV1-2    | IGKV3-15 | 6.4                     | 31.27                                             | 2.01                                        |
| ab029     | IGHV5-51   | IGLV2-14 | 17.5                    | 13.91                                             | 2.44                                        |
| ab066     | IGHV1-69   | IGKV4-1  | 31.6                    | 9.23                                              | 2.92                                        |
| ab008     | IGHV1-69   | IGKV3-20 | 35.1                    | 7.21                                              | 2.53                                        |
| ab123     | IGHV3-9    | IGLV3-21 | 40.2                    | 5.86                                              | 2.36                                        |
| ab079     | IGHV4-31   | IGLV3-21 | 42.6                    | 4.30                                              | 1.83                                        |
| ab152     | IGHV5-51   | IGKV2-30 | 45.1                    | 6.39                                              | 2.88                                        |
| ab166     | IGHV1-69   | IGLV1-40 | 55                      | 4.52                                              | 2.49                                        |
| ab189     | IGHV3-30-3 | IGLV3-21 | 73.7                    | 2.37                                              | 1.75                                        |
| ab177     | IGHV3-21   | IGLV2-14 | >100                    | 0.06                                              | 2.39                                        |
| ab185     | IGHV3-23   | IGLV2-23 | >100                    | 0.13                                              | 3.79                                        |

670

671

672 **fig. S8. SARS-CoV-2 RBD-binding kinetics of isolated naive antibodies.** (A) Bi-layer  
 673 interferometry (BLI) binding kinetic analysis of titrated SARS-CoV-2 RBD to immobilized Fabs.  
 674 Dotted line at 60 s denotes the start of the dissociation phase. (B) Kinetic and equilibrium constants  
 675 for binding to RBD calculated from a 1:1 binding model using a global fit to all curves for each  
 676 Fab using vendor supplied software. B38 Fab is used as a positive control.

677

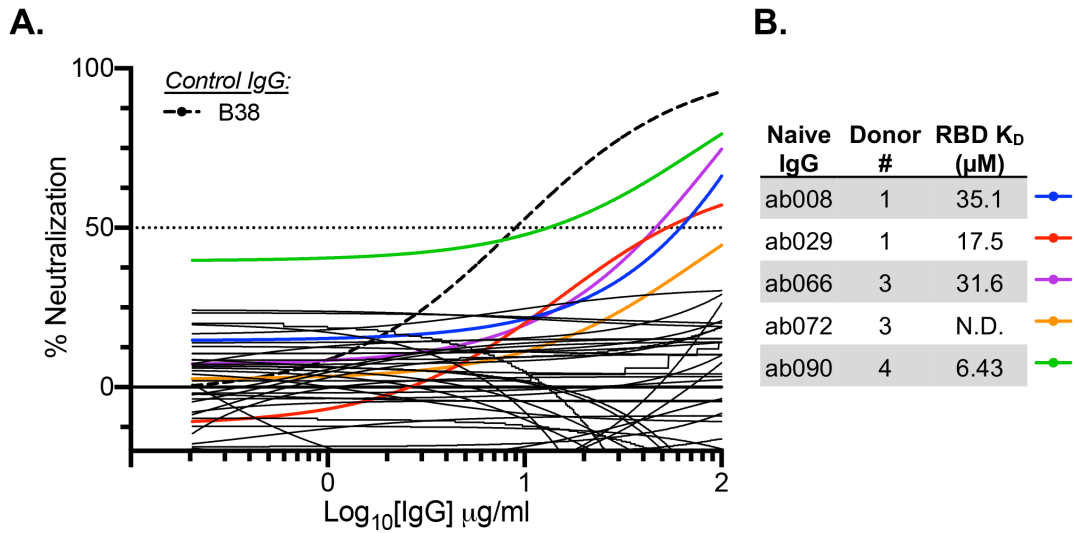

678

679

680 **fig. S9. SARS-CoV-2 pseudotyped neutralization assay.** (A) Neutralization data for 44 purified

681 IgGs. Curves in color highlighted antibodies with neutralizing activity with (B) donor and

682 monovalent RBD affinity listed for this subset of antibodies. Dashed lines indicate  $IC_{50}$  values and

683 data represent means  $\pm$  SD of two technical replicates.

684

685 **SI REFERENCES**

686

- 687 1. B. Briney, A. Inderbitzin, C. Joyce, D. R. Burton, Commonality despite exceptional diversity  
688 in the baseline human antibody repertoire. *Nature* **566**, 393–397 (2019).

689

690
